# Supplementary material for: Effects of Matrix pH on Spontaneous Transient Depolarization and Reactive Oxygen Species Production in Mitochondria
Source: PubMed Central journal article supplement (PMC8278022; doi:10.3389/fcell.2021.692776), 2021-06-30

## Supplementary Figure captions

### Figure S1. Calibration curve for determining matrix and cytosolic pH from BCECF fluorescence ratio.

BCECF fluorescence was measured in the presence of 5 and 30  $\mu\text{M}$  CCCP for isolated mitochondria and H9c2 cells, respectively, without the addition of malate. **(A)** Dots show experimental data. The solid line shows the theoretical curve of  $(F_L/F_S) = (A + B \times 10^{(7-\text{pH})}) / (C + 10^{(7-\text{pH})})$  and is fitted to the experimental data with least-square fitting, where A is 0.045, B is 0.37, and C is 0.042. The dichroic mirror used is U-MWBV (Olympus, Japan). **(B)** In H9c2 cells, the above-mentioned theoretical curve is fitted to the experimental data with least-square fitting, where A is 0.567, B is 2.40, and C is 0.097. The dichroic mirror used is U-MNIBA (Olympus, Japan).

### Figure S2. Effects of TMRE concentration and illumination intensity on the transient depolarizations.

Frequencies of the transient depolarization were determined in the presence of 1 mM malate. **(A)** Effects of TMRE concentration on the transient depolarization. **(B)** Effects of excitation intensity on the transient depolarization. Excitation intensity was changed with the neutral density filters with 12, 25, and 50% transmittance.

### Figure S3. Effects of ADP on respiration and antimycin A-induced ROS production.

**(A)** Effects of ADP on respiration in the absence of oligomycin. ADP was added to the mitochondrial suspension at 5 mM. **(B)** Effects of ADP on antimycin A (AA)-induced ROS production in the presence of oligomycin. Mitochondria were incubated with 1  $\mu\text{M}$  antimycin A for 20 min at 25 °C. Values represent the mean  $\pm$  SEM (n = 3). \* $p < 0.05$  vs. control.

### Figure S4. Effects of CCCP and $\text{NH}_4^+$ on H9c2 cells.

**(A)** Effects of CCCP concentration on Cell TMRE in H9c2 cells. **(B)** Effects of  $\text{NH}_4^+$  on cytosolic pH in H9c2 cells. Values represent the mean  $\pm$  SEM (n > 10). \* $p < 0.05$  vs 0  $\mu\text{M}$  CCCP for A; control for B.

### Figure S5. TMRE fluorescence of mitochondria in H9c2 cells.

The TMRE fluorescence image of H9c2 cells were obtained by using a 40 $\times$  (Uapo40 $\times$ /340, NA = 0.9; Olympus), with binning pixels 1  $\times$  1, under computer control.

**Figure S1**

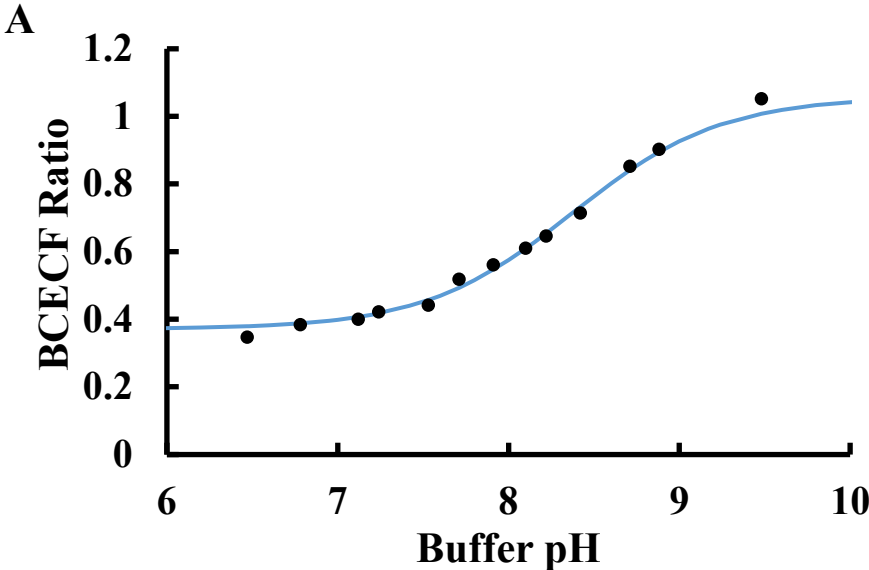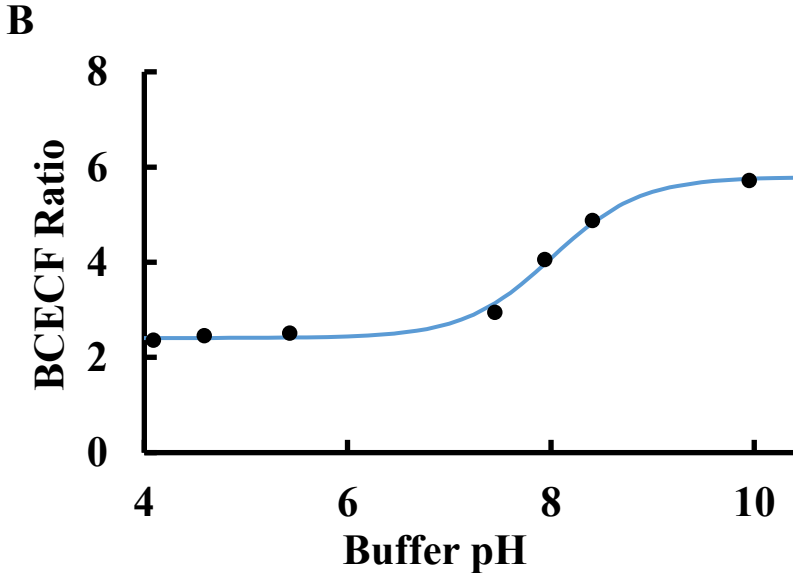

**Figure S2**

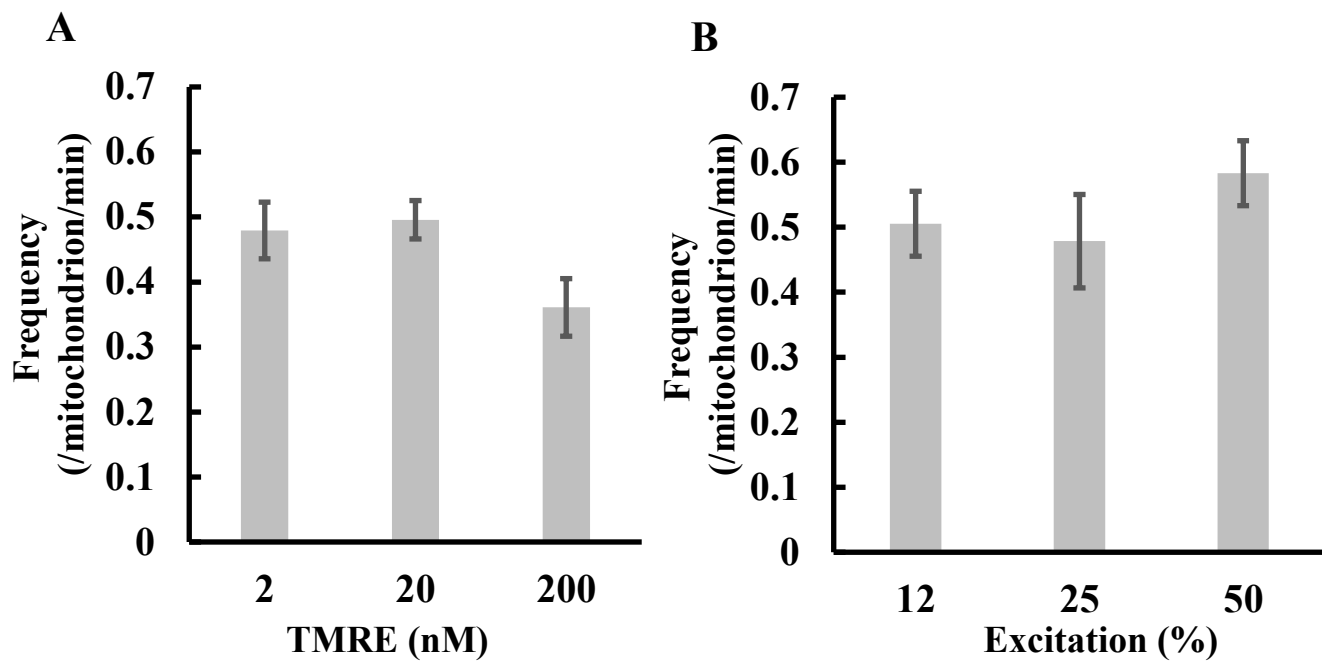

**Figure S3**

**A**

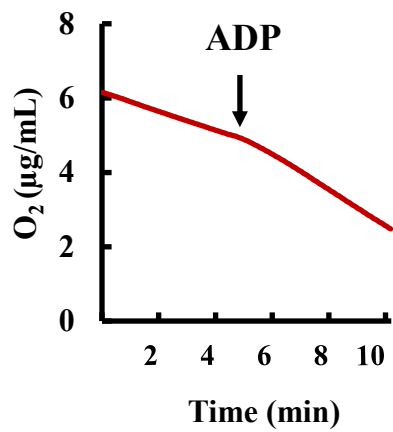

**B**

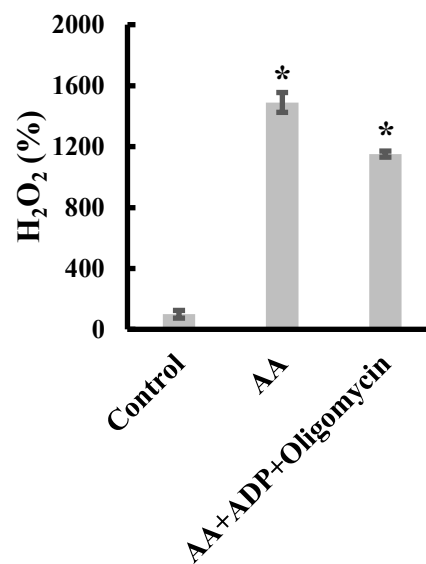

**Figure S4**

**A**

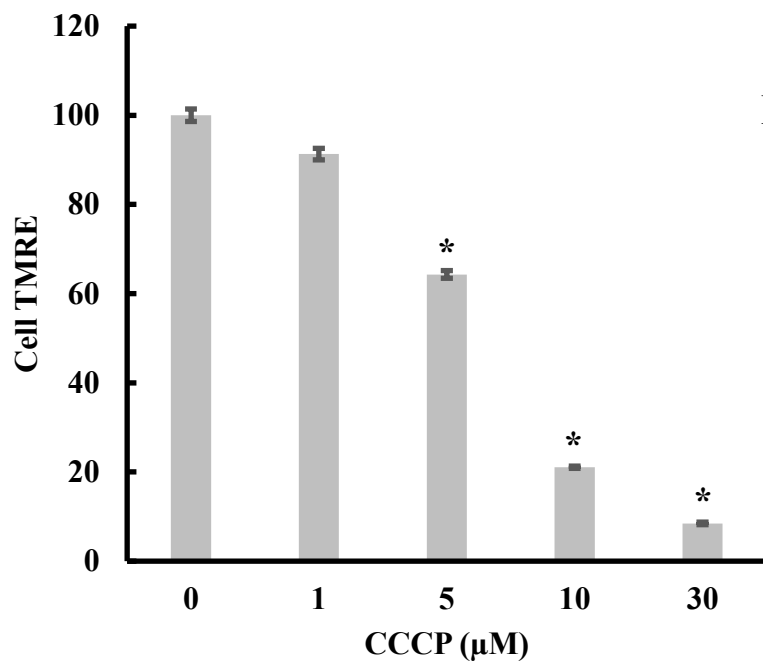

**B**

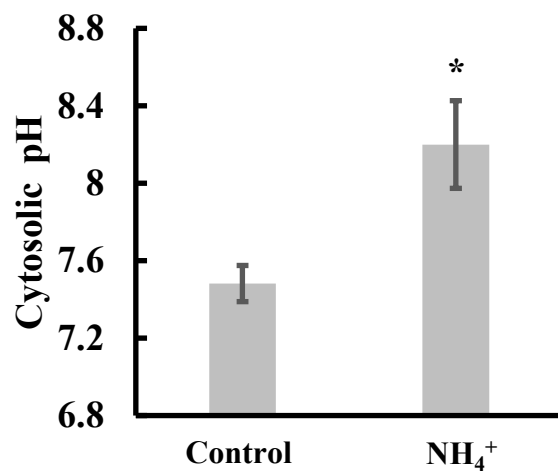

**Figure S5**

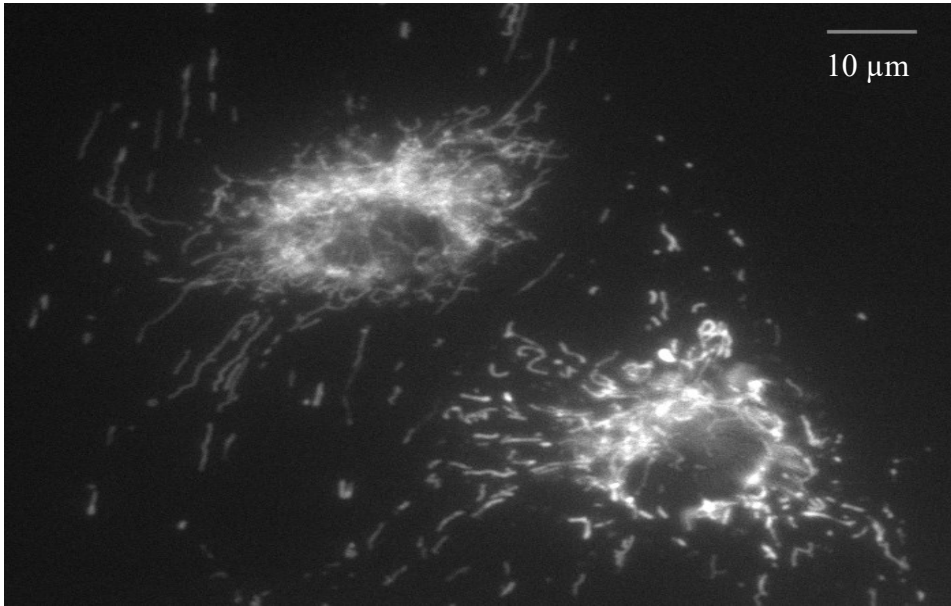

Supplement: Data_Sheet_1.pdf [file Data_Sheet_1.pdf]
